1 **Risk of recurrent pregnancy loss in the Ukrainian population using a combined effect of genetic**  
2 **variants**

3

4 Loizidou E. M<sup>1</sup>, Kucherenko A.<sup>2</sup>, Tatarsky P.<sup>2</sup>, Chernushyn S.<sup>2</sup>, Livshyts G.<sup>2</sup>, Gulkovskyi R.<sup>2</sup>,  
5 Vorobiova I.<sup>3</sup>, Antipkin Y.<sup>3</sup>, Gorodna O.<sup>2</sup>, Kaakinen M. A.<sup>1,5</sup>, Prokopenko I.<sup>1,5\*</sup>, Livshits L.<sup>2\*</sup>

6

7 <sup>1</sup> Section of Genomics of Common Disease, Department of Medicine, Imperial College London,  
8 London, United Kingdom

9 <sup>2</sup> Institute of Molecular Biology and Genetics NAS, Kiev, Ukraine

10 <sup>3</sup> Institute of Paediatrics, Obstetrics and Gynaecology of the National Academy of Medical Sciences,  
11 Kiev, Ukraine

12 <sup>4</sup> “ISIDA” Clinic, Kiev, Ukraine

13 <sup>5</sup> School of Biosciences and Medicine, Department of Clinical and Experimental Medicine, University  
14 of Surrey, Guildford, United Kingdom

15

16 \* Corresponding authors: Inga Prokopenko and Liudmila Livshits

17 Email: [i.prokopenko@surrey.ac.uk](mailto:i.prokopenko@surrey.ac.uk), [livshits@imbg.org.ua](mailto:livshits@imbg.org.ua)

18

19 **Abstract**

20 Recurrent pregnancy loss (RPL) affects nearly 5% of the women of reproductive age. Its heterogeneous  
21 and multifactorial nature complicate both diagnosis and treatment, as well as identification of the genetic  
22 contribution to RPL. Evidence about the aetiology of RPL is controversial; however, several biological  
23 mechanisms have been proposed. Given the current knowledge about the genetic susceptibility to  
24 idiopathic RPL, we aimed to evaluate the predictive ability of a combined variant panel to the risk of  
25 RPL in the Ukrainian sample of 114 cases and 106 healthy controls. We genotyped variants within the  
26 12 genetic loci reflecting the main biological pathways involved in pregnancy maintenance: blood  
27 coagulation (*F2*, *F5*, *F7*, *GP1A*), hormonal regulation (*ESR1*, *ADRB2*), endometrium and placental  
28 function (*ENOS*, *ACE*), folate metabolism (*MTHFR*) and inflammatory response (*IL6*, *IL8*, *IL10*). We  
29 showed that a genetic risk score (GRS) calculated from the 12 variants was associated with an increased  
30 risk of RPL (odds ratio 1.56, 95% CI: 1.21,2.04,  $P=8.7\times 10^{-4}$ ). The receiver operator characteristic  
31 (ROC) analysis resulted in the area under the curve (AUC) of 0.64 (95% CI: 0.57, 0.72), indicating an  
32 improved ability of the GRS to classify women with and without RPL. In summary, implementation of  
33 the GRS approach can help defining women at higher risk to complex multifactorial conditions such as  
34 RPL. Future well-powered genome-wide association studies will help in the dissection of biological  
35 pathways not hypothesised previously for RPL and further improve the prediction and identification of  
36 those at risk for RPL.

37

38

## 39 **Introduction**

40 The loss of two or more sequential pregnancies in the first trimester of gestation is defined as recurrent  
41 pregnancy loss (RPL)(1). Nearly one in twenty women of reproductive age is affected by this  
42 condition(2). Heterogeneity and multifactorial nature of RPL complicate both diagnosis and treatment  
43 of RPL, thus causing severe distress for affected couples and their clinicians(3,4). Despite a large  
44 number of clinical and genetic studies aiming to identify probable causes and suitable treatments of  
45 RPL, most of the findings remain controversial and demand replication(3,5).

46

47 The vast majority of early pregnancy losses (50%–60%) are the consequence of chromosomal  
48 abnormalities, which can be of parental origin, or arise de novo in the embryo from parents with normal  
49 chromosomes(6,7). Nonetheless, endocrine, immunological, anatomical and other hypotheses are  
50 proposed to play a leading role in RPL aetiology, with most of the remaining RPL cases being  
51 idiopathic(5,8). In patients with idiopathic RPL, a multifactorial nature of the condition is usually  
52 suggested, with genetic component viewed as an important risk factor(5,9,10). Large-scale genome-  
53 wide association studies (GWAS) in appropriately defined individuals should enable better dissection  
54 of pregnancy maintenance/loss mechanisms, as well as provide evaluation of miscarriage risks in  
55 couples with reproductive complications. However, the genetic susceptibility to RPL in female health  
56 has not been addressed. The identification of RPL cases is laborious and expensive, hindering the setup  
57 of a well-powered GWAS for this outcome. Many studies, including the UK Biobank consisting of  
58 500,000 individuals, have collected data on self-reported miscarriages and the number of spontaneous  
59 miscarriages. GWAS on the UK Biobank data(11) on such surrogate phenotypes for RPL have not  
60 resulted in any common variants associated with RPL at genome-wide significance, plausibly reflecting  
61 an inaccurate re-call and complex genetic susceptibility to RPL.

62

63 While more precise data on idiopathic RPL are being collected allowing well-powered GWAS in the  
64 future, our best approach is to look at the potential biological mechanisms proposed for RPL  
65 pathogenesis and use such information to infer the potentially relevant genes in RPL susceptibility. The  
66 suggested mechanisms include alterations in blood coagulation, hormonal regulation, endometrium and  
67 placental function, folate metabolism and inflammatory response.

68

69 *Blood coagulation.* Haemostasis-related genes, such as the coagulation factor II and V genes (*F2* and  
70 *F5*, respectively), have been linked to venous thromboembolism and thrombosis in recent GWAS(12–  
71 15). They contribute to hereditary thrombophilia, and it has been suggested that they could act  
72 throughout pregnancy, causing miscarriages(16). Indeed, a study on *F2* and *F5* genes has shown  
73 associations with variation in these genes and RPL(17). Associations between polymorphisms in the  
74 coagulation factor VII (*F7*) gene and recurrent miscarriages were also reported in a study from

75 Poland(18). Another strong candidate within the blood coagulation pathway to RPL is the glycoprotein  
76 Ib (platelet), alpha (*GP1A*) gene which is an important player in the platelet adhesion to collagen(19).

77

78 *Hormonal regulation.* The relevance of hormonal regulation in the susceptibility of RPL comes from  
79 the knowledge that estrogens modulate multiple reproductive functions, including progesterone  
80 production and uteroplacental blood flow(20). Estrogen receptors (ERs), which in human consist of ER $\alpha$   
81 and ER $\beta$ , encoded by *ESR1* and *ESR2* genes, respectively, are mediators of estrogen signalling and  
82 function (21,22). A study of *ESR1* locus variants and RPL did not yield support for the association(23);  
83 however, recent GWAS have linked variation within *ESR1* to susceptibility to endometriosis(24) and to  
84 maternal age at first birth(25). Stress-induced adrenergic receptor (*ADRB2*) activation may in turn  
85 directly affect embryo-maternal interactions during implantation, resulting in pregnancy complications  
86 and miscarriage (26). No studies have directly assessed the association with variation in this gene and  
87 RPL; however, controversial reports for the effects of *ADRB2* variants have been reported on preterm  
88 delivery (27,28) and its potential role was suggested as being a drug target for prevention of preterm  
89 delivery (29).

90

91 *Endometrium and placental function.* Abnormalities of placental vasculature in the chorionic villi of  
92 RPL patients can be determined through low expression levels of angiogenesis-related genes, such as  
93 the endothelial nitric oxide synthase (*ENOS*) and angiotensin I-converting enzyme (*ACE*) genes.  
94 Variability within these genes may result in gestational complications, including pregnancy loss, pre-  
95 eclampsia, intrauterine foetal death and growth restriction (30). More specifically, variability in *ACE* is  
96 associated with RPL (31). The *ACE* gene, which generates angiotensin II from angiotensin I as a potent  
97 vasopressor (32,33), is a key component of the rennin-angiotensin system (RAS) that affects  
98 homeostasis (34). There is evidence that the presence of the D allele or D/D genotype is correlated with  
99 elevated plasma and tissue-specific ACE activity (35,36). In turn, eNOS is the main enzyme required  
100 for vascular NO production, by converting L-arginin to L-citrulline. *eNOS* is expressed in the terminal  
101 chorionic villous vessels and in the cyto- and syncytio-trophoblast layers during the first trimester (37).

102

103 *Folate metabolism.* Variation within the 5,10-methylenetetrahydrofolate reductase (*MTHFR*) gene is  
104 associated with higher homocysteine (38,39) and serum folate concentrations (40). Mild elevations in  
105 the total plasma homocysteine (tHcy) concentration, a risk factor for placental abruption, and infarction  
106 and preeclampsia (41), are also associated with an increased risk of RPL (42–46). Furthermore, Nelen  
107 *et al.* demonstrated that the homozygosity for a common 677C→T mutation in the *MTHFR* gene leads  
108 to a two-fold to three-fold higher risk of RPL (46). Another association study between *MTHFR* and RPL  
109 was inconclusive, despite a large sample size of 1,830 cases and 3,037 controls (47).

110

111 *Inflammation*. Cytokines form a complex regulatory network which maintains homeostasis between the  
112 foetus and maternal immune system. If this delicate balance is adversely affected, immunoregulatory  
113 mechanisms may be insufficient to restore homeostasis and this may lead to pregnancy failure (48).  
114 Variation especially at the inflammatory gene *IL10* has been associated with REPL (OR=3.01, P-  
115 value<10<sup>-4</sup>)(49), whereas the evidence between its association with RPL has been less conclusive (50),  
116 similarly to *IL6* and RPL (51). In addition, the chemokine IL-8 is a crucial player in the process of  
117 implantation, promoting trophoblastic cells migration and invasion (52). Moreover, microRNA studies  
118 for endometriosis have shown the potential role of IL-8 levels in the pathogenesis of endometriosis via  
119 stimulating endometrial stromal cell invasiveness (52).

120

121 Given the current knowledge about the genetic contribution to idiopathic RPL, we aimed to evaluate the  
122 predictive ability of a combined gene set of RPL associated DNA variants to the risk of RPL in a  
123 Ukrainian sample of 114 cases and 106 healthy controls. We genotyped variants at/within 12 genes  
124 reflecting the main biological pathways involved in pregnancy maintenance: blood coagulation (*F2*, *F5*,  
125 *F7*, *GPIA*), hormonal regulation (*ESR1*, *ADRB2*), endometrium and placental function (*ENOS*, *ACE*),  
126 folate metabolism (*MTHFR*) and inflammatory response (*IL6*, *IL8*, *IL10*).

127

## 128 **Material and Methods**

### 129 *Study sample*

130 REPLIK (REcurrent Pregnancy Loss In Kiev) study case group comprised 114 unrelated women at a  
131 mean age of 34.2 (SD 4.5) years with idiopathic RPL history undergoing observation in the State  
132 Institution “Institute of Paediatrics, Obstetrics and Gynaecology of NAMS of Ukraine” and perinatal  
133 clinic “ISIDA”. All the women were of Ukrainian territory descent from across Ukraine. RPL diagnosis  
134 was determined in case of at least two consequent miscarriages in the first trimester (mean number of  
135 foetal losses 2.7, SD 0.9). The American Society for Reproductive Medicine defines RPL as two or  
136 more clinical pregnancy losses, not necessary consecutive, documented by ultrasonography or  
137 histopathologic examination(53). In order to ensure the idiopathic nature of RPL in the studied patients,  
138 the following enrolment criteria were set: absence of a family history of birth defects; absence of the  
139 genital tract anatomic abnormalities, confirmed by ultrasonography or hysterosalpingography; a normal  
140 karyotype of both the studied individual as well as their partner, defined by GTG-banded chromosome  
141 analysis including GTG-banded metaphase plates with a minimum resolution of 400–450 bands per  
142 each sample. Moreover, blood tests for immunologic risk factors (anti-nuclear antibodies, anti-  
143 phospholipid antibodies, lupus anticoagulant), defects of thyroid function, diabetes mellitus,  
144 hyperprolactinemia and infections such as chlamydia were performed, and none of the individuals  
145 positive were included into the study group. A control group comprised 106 unrelated healthy women  
146 at a mean age of 26.2 (SD 3.0) years with no history of RPL or other pregnancy complications, no foetal  
147 losses, and have given birth to at least one naturally conceived child. Prior to clinical examination and

148 genotyping, all participants had given their informed consent. The study has been approved by The  
149 Bioethical Committee of Institute of Molecular Biology and Genetics of NAS of Ukraine.

150

#### 151 *Blood sample collection, DNA extraction and genotyping procedures*

152 Venous blood samples from patients and control group individuals were collected into 4ml vacutainer  
153 tubes containing EDTA. Genomic DNA was extracted from blood samples by standard method using  
154 proteinase K with the following chlorophorm extraction. We used 13 genetic variants previously  
155 associated with RPL in European populations or those representing genetic networks of pathological  
156 processes leading to RPL (**Table 1** provides information about variants and reference papers). A SNP  
157 located in *IL10* gene (rs1800872) was excluded from the polygenic risk score calculation due to high  
158 LD ( $r^2=0.26$  in Europeans) with a nearby SNP included in the study (rs1800896). Genotyping for  
159 selected polymorphic variants was performed by common variations of PCR-based assays as described  
160 previously (**Table 1**) with slight modifications. We identified genotypes for all genotyped individuals  
161 without any missing values. However, genotyping of the 13 variants was done for the individuals  
162 depending on their time of joining the project and availability of the reagents (**Table 2** shows the  
163 numbers of cases and controls genotyped for each variant).

164

#### 165 *Association analysis*

166 We performed single-variant association analyses between each of genotyped variants and RPL. We  
167 used logistic regression for single-variant analyses assuming a log-additive model of association,  
168 similarly to standard assumptions in GWAS. We report estimates of ORs along with their 95%  
169 confidence intervals (CIs).

170

#### 171 *Genetic risk score calculation*

172 We calculated the genetic risk score (GRS) using information from a set of 12 variants previously  
173 associated with recurrent pregnancy loss (RPL) (**Table 1**). Among genotyped variants, there are ten  
174 SNPs, rs1799752 at *ACE* gene is an insertion/deletion (indel), and another is a tandem repeat (VNTR)  
175 in the intron 4 of *ENOS* gene. The risk allele count for each SNP was weighted by its established effect  
176 size using previously published findings. The effect sizes were estimated from the odds ratios (ORs) in  
177 the form of beta coefficients ( $\log(\text{OR})$ ) for association between GRS and RPL assuming an additive  
178 genetic model for association. The weighted GRS was corrected for missing genotypes by multiplying  
179 the score with the total number of variants and then dividing by the number of genotyped variants per  
180 person, i.e. the scores for people with less genotyped variants got more weight (54). The effect estimate  
181 for rs1800896 located at *IL10* was from a multi-ethnic study, discordant from our study's ethnic descent.  
182 We therefore used the present study effect estimate, which was still smaller than that published for the  
183 other *IL10* variant. In addition, for the variants in *F7*, *GPIA*, *ADRB2* and *IL8* there were no published  
184 studies for their association with RPL. Hence, we used the effect sizes from our data as weights. As a

185 sensitivity check we also calculated the GRS using weights from our study only. Finally, we calculated  
186 an unweighted GRS and evaluated its effect on RPL.

187

### 188 *Receiver operating characteristic analysis*

189 Next, we performed receiver operating characteristic (ROC) analysis to determine the predictive value  
190 of the estimated GRS in RPL. The efficacy of the GRS prediction is measured using the area under the  
191 curve (AUC) which is the statistic calculated on the observed case scale. The statistical analyses were  
192 conducted using the statistical software pROC package in R along with other functions (55).

193

## 194 **Results**

### 195 *Association analysis*

196 We tested the 13 genetic variants for association with RPL in the REPLIK study from Ukraine. Within  
197 this variant set only rs1800896 at *IL10* gene was nominally associated with RPL (OR[95% CI]:  
198 1.60[1.07, 2.42],  $P=0.025$ , **Table 2**). Whereas the other variants did not reach nominal significance, five  
199 out of the eight with an effect estimate available from literature were in the same direction of the effect in  
200 our study as in the published ones (**Table 1, Table 2**). The sample sizes varied greatly for the genotyped  
201 SNPs, whereas the GRS accounted for the variable number of genotyped SNPs per individual. The  
202 association between RPL and the GRS, based on published effect estimates, revealed a statistically  
203 significant association ( $P=8.7 \times 10^{-4}$ ) in the REPLIK study. The combined effect of all tested variants  
204 resulted in a 1.56 times (95% CI [1.21, 2.04]) increased odds of RPL between cases and controls. The  
205 sensitivity analysis using the GRS with weights from our study effect estimates resulted in an OR of  
206 1.83 (95% CI [1.34, 2.57],  $P=3.0 \times 10^{-4}$ ). The unweighted GRS was also associated with an increased risk  
207 of RPL with an OR of 1.16 (95% CI [1.05, 1.29],  $P=2.0 \times 10^{-3}$ ).

208

### 209 *Receiver Operator Characteristic analysis*

210 The ROC analysis showed an area under the curve (AUC) of 0.64 (95% CI [0.57, 0.72]). This indicates  
211 a moderate to high ability for the GRS to correctly classify women with and without RPL. The sensitivity  
212 of 72% at the best discriminating point implies that the GRS can effectively identify women having  
213 experienced pregnancy losses (**Figure 1**). The AUCs for the GRS using our study effect estimates as  
214 weights and for the unweighted GRS were 0.64 (95% CI [0.57, 0.71]) and 0.62 (95% CI [0.55, 0.70]),  
215 respectively.

216

## 217 **Discussion**

218 In this study we evaluated the combined effect of 12 genetic variants on RPL risk through GRS  
219 implemented in a case-control REPLIK study from the Ukraine. We showed that even with such a small  
220 number as 12 variants, when carefully chosen, we can already achieve predictive ability using weighted  
221 GRSs.

222

223 For some of the variants used (within *F2*, *F5*, *ACE*, *IL10*) we had previous evidence for their association  
224 with RPL (17,31,49), whereas others (within *F7*, *GPIA*, *ESRI*, *ADRB2*, *ENOS*, *MTHFR*, *IL6*, *IL8*) were  
225 chosen for their hypothesised biological mechanisms (18,19,23,27,28,47,51,52,56). The difficulty in  
226 establishing genetic associations with the complex condition of RPL was reflected in our single-variant  
227 analyses, i.e. we could not confirm the associations with RPL for majority of the variants with our  
228 available sample. A likely contributing factor was the relatively small sample size for some of the  
229 variants due to our genotyping strategy. For the *IL10* variant, having the whole sample genotyped, we  
230 demonstrated its association with RPL with a similar to previous study effect estimate (49).

231

232 It has been acknowledged that the discrete genetic variants for RPL have a relatively low sensitivity and  
233 specificity (3). Each individual case of idiopathic RPL usually cannot be explained by one risk factor  
234 and should be treated as a multifactorial condition (9). Indeed, GWAS for complex traits have shown  
235 that individual genetic variants usually provide relatively modest contribution to the trait variability in  
236 terms of their per-allele effect size, typically in the per-allele effects being within the range of 5-10%  
237 increase in risk in relation to that of risk estimated in general population (57), and hence require large  
238 sample sizes for detection. Therefore, it may be more effective to evaluate the risk of RPL using a panel  
239 of population-specific low-effect genetic markers, representing distinct physiological gene networks.  
240 Our selection of the gene panel based on the hypothesised biological pathways proved successful since  
241 by combining their effects, we could already predict the risk of RPL in our cohort. The results were not  
242 influenced by the selection of the weights, as our sensitivity analyses showed. It is worth noticing that  
243 we achieved an AUC of 0.64 (95% CI 0.57-0.72) with already 12 SNPs. A recent study combining  
244 millions of SNPs into genome-wide polygenic scores for several complex diseases achieved AUCs of  
245 similar strength. For example, an AUC of 0.63 was reported for inflammatory bowel disease from a  
246 GRS consisting of 6.9 million SNPs (58). Taken together, our results are important considering that RPL  
247 is a laborious and expensive phenotype to collect. Since the start of large-scale genome-wide association  
248 studies, RPL has lacked novel insights establishing its underlying genetic mechanisms with no major  
249 publications probably due to clinical requirements to the phenotype definition. However, our  
250 investigation suggests that even a small number of SNPs in appropriately defined cases and controls can  
251 be used for predictive purposes.

252

253 One important limitation of RPL genetic association studies arises from the fact that even though the  
254 differences in population frequencies of studied genetic polymorphisms may be significant, ethnicity-  
255 specific associations are rarely addressed. Moreover, a vast majority of studies are performed on  
256 European and American Caucasians, as well as, less frequently, Southern or Eastern Asians (5,23,59).  
257 On one hand, this situation allows increasing the significance of discovered effects in European  
258 populations through meta-analyses (17). On the other hand, it complicates adoption of such effect



259 estimates for other ethnic groups due to possible difference in allele frequencies and effect size estimates  
260 between populations and ethnic groups (23,56).

261

262 In summary, with the careful selection of the DNA variant set and the implementation of methods such  
263 as the GRS, we can predict susceptibility to complex multifactorial conditions such as RPL. With the  
264 hope of future well-powered studies, especially GWAS, adding to the knowledge of biological pathways  
265 not hypothesised previously for RPL, we will be able to further improve the prediction and identification  
266 of those at risk for RPL.

267

## 268 **Acknowledgements**

269 IP is funded in part by the World Cancer Research Fund (WCRF UK) and World Cancer Research Fund  
270 International (2017/1641), the Wellcome Trust (WT205915).

271 **Table 1. Genetic variants used to assess their effect on the risk of RPL in the REPLIK study.**

| Locus name                                | SNP rsID          | EA/NE A | EAF (1000 G*) | OR (95% CI)          | P-value            | Case/Control sample size | Outcome  | Reference | Genotyping method   | Reference |
|-------------------------------------------|-------------------|---------|---------------|----------------------|--------------------|--------------------------|----------|-----------|---------------------|-----------|
| <i>Blood coagulation</i>                  |                   |         |               |                      |                    |                          |          |           |                     |           |
| <i>F2</i>                                 | rs1799963         | A/G     | 0.008         | 2.00<br>(1.00,4.00)  | < 0.03             | 342/123                  | RPL      | (17)      | RFLP                | (60)      |
| <i>F5</i>                                 | rs6025            | T/C     | 0.99          | 2.5<br>(1.80,3.40)   | < 10 <sup>-3</sup> | 342/123                  | RPL      | (17)      | RFLP                | (60)      |
| <i>F7</i>                                 | rs6046            | G/A     | 0.89          | -17                  | -                  | -                        | -        | -         | RFLP                | (61)      |
| <i>GPIA</i>                               | rs1126643         | T/C     | 0.40          | -                    | -                  | -                        | -        | -         | RFLP                | (62)      |
| <i>Hormonal regulation</i>                |                   |         |               |                      |                    |                          |          |           |                     |           |
| <i>ESR1</i>                               | rs2234693         | T/C     | 0.58          | 1.10<br>(0.57,2.13)  | > 0.05             | 350/646                  | RPL      | (56)      | RFLP                | (63)      |
| <i>ADRB2</i>                              | rs1042714         | G/C     | 0.41          | -                    | -                  | -                        | -        | -         | RFLP                | (64)      |
| <i>Endometrium and placental function</i> |                   |         |               |                      |                    |                          |          |           |                     |           |
| <i>ENOS</i>                               | Intron-4†<br>VNTR | B/A     | -             | 1.005<br>(0.74,1.37) | > 0.05             | 410/357                  | RPL      | (23)      | Allele-specific PCR | (65)      |
| <i>ACE</i>                                | rs1799752‡        | D/I     | -             | 2.06<br>(1.46,2.91)  | NA                 | 740/329                  | RPL      | (31)      | Allele-specific PCR | (66)      |
| <i>Folate metabolism</i>                  |                   |         |               |                      |                    |                          |          |           |                     |           |
| <i>MTHFR</i>                              | rs1801133         | A/G     | 0.36          | 1.25<br>(0.93,1.67)  | 0.14               | 1830/3037                | RPL      | (47)      | RFLP                | (67)      |
| <i>Inflammatory response</i>              |                   |         |               |                      |                    |                          |          |           |                     |           |
| <i>IL6</i>                                | 14718             | C/G     | -             | 1.214<br>(0.88,1.67) | 0.24               | 230/188                  | RPL      | (51)      | RFLP                | (68)      |
| <i>IL8</i>                                | rs2227306         | C/T     | 0.61          | -                    | -                  | -                        | -        | -         | RFLP                | (69)      |
| <i>IL10</i>                               | rs1800896         | C/T     | 0.45          | 1.27<br>(0.95,1.70)  | > 0.05             | 635/571                  | RPL      | (50)      | RFLP                | (70)      |
| <i>IL10</i>                               | rs1800872         | T/G     | 0.76          | 3.01<br>(1.92,4.72)  | < 10 <sup>-4</sup> | 342/123                  | Early PL | (49)      | RFLP                | (71)      |

272 Legend: † Indel; ‡ Tandem repeat; EA/NEA - Effect allele/Non-effect allele; \*EAF (1000 G) – 1000 Genomes project effect allele frequency in Europeans

1 **Table 2. Associations between 12 previously reported genetic variants and RPL in the REPLIK study.**

| Locus name   | Chr:Position         | Variant ID        | EA/NEA | EAF cases/controls | N cases / N controls | EAE    | OR (95% CI)                       | P-value                    |
|--------------|----------------------|-------------------|--------|--------------------|----------------------|--------|-----------------------------------|----------------------------|
| <i>F2</i>    | 11:46761055          | rs1799963         | A/G    | 0.011/0.72         | 110/46               | 0.49   | 1.64<br>(0.23, 32.48)             | 0.66                       |
| <i>F5</i>    | 1:169519049          | rs6025            | T/C    | 0.014/0.71         | 114/46               | -0.22  | 0.80<br>(0.15, 5.92)              | 0.80                       |
| <i>F7</i>    | 13:113773159         | rs6046            | G/A    | 0.48/0.070         | 75/46                | 0.34   | 1.40<br>(0.65, 3.04)              | 0.38                       |
| <i>GPIA</i>  | 5:52347369           | rs1126643         | T/C    | 0.35/0.23          | 81/46                | 0.35   | 1.43<br>(0.85,2.44)               | 0.18                       |
| <i>ESR1</i>  | 6:152163335          | rs2234693         | T/C    | 0.54/0.48          | 110/106              | -0.18  | 0.84<br>(0.57, 1.23)              | 0.37                       |
| <i>ADRB2</i> | 5:148206473          | rs1042714         | G/C    | 0.33/0.25          | 81/46                | 0.38   | 1.47<br>(0.86,2.56)               | 0.16                       |
| <i>ENOS</i>  | 15:35147732-35262040 | Intron-4†<br>VNTR | B/A    | 0.55/0.12          | 102/46               | 0.15   | 1.16<br>(0.63,2.08)               | 0.63                       |
| <i>ACE</i>   | 17:61565890          | rs1799752†        | D/I    | 0.35/0.0023        | 114/46               | -0.048 | 0.95<br>(0.59, 1.54)              | 0.85                       |
| <i>MTHFR</i> | 1:11856378           | rs1801133         | A/G    | 0.21/0.52          | 114/46               | 0.33   | 1.40<br>(0.80, 2.51)              | 0.25                       |
| <i>IL6</i>   | 7:22766840           | 14718             | C/G    | 0.55/0.41          | 106/86               | 0.11   | 1.10<br>(0.77,1.64)               | 0.57                       |
| <i>IL8</i>   | 4:74607055           | rs2227306         | C/T    | 0.39/0.61          | 114/106              | 0.11   | 1.10<br>(0.76,1.64)               | 0.60                       |
| <i>IL10</i>  | 1:206946897          | rs1800896         | C/T    | 0.54/0.46          | 114/106              | 0.47   | 1.60<br>(1.07, 2.42)              | 0.025                      |
| <b>GRS</b>   |                      |                   |        |                    | <b>114/106</b>       |        | <b>1.56</b><br><b>(1.21,2.04)</b> | <b>8.7x10<sup>-4</sup></b> |

2 Legend: † Indel; ‡ Tandem repeat; EA/NEA: Risk allele/Alternate allele; EAF: Effect allele frequency; EAE: Estimated allelic effect (beta); GRS, genetic risk  
3 score.

1

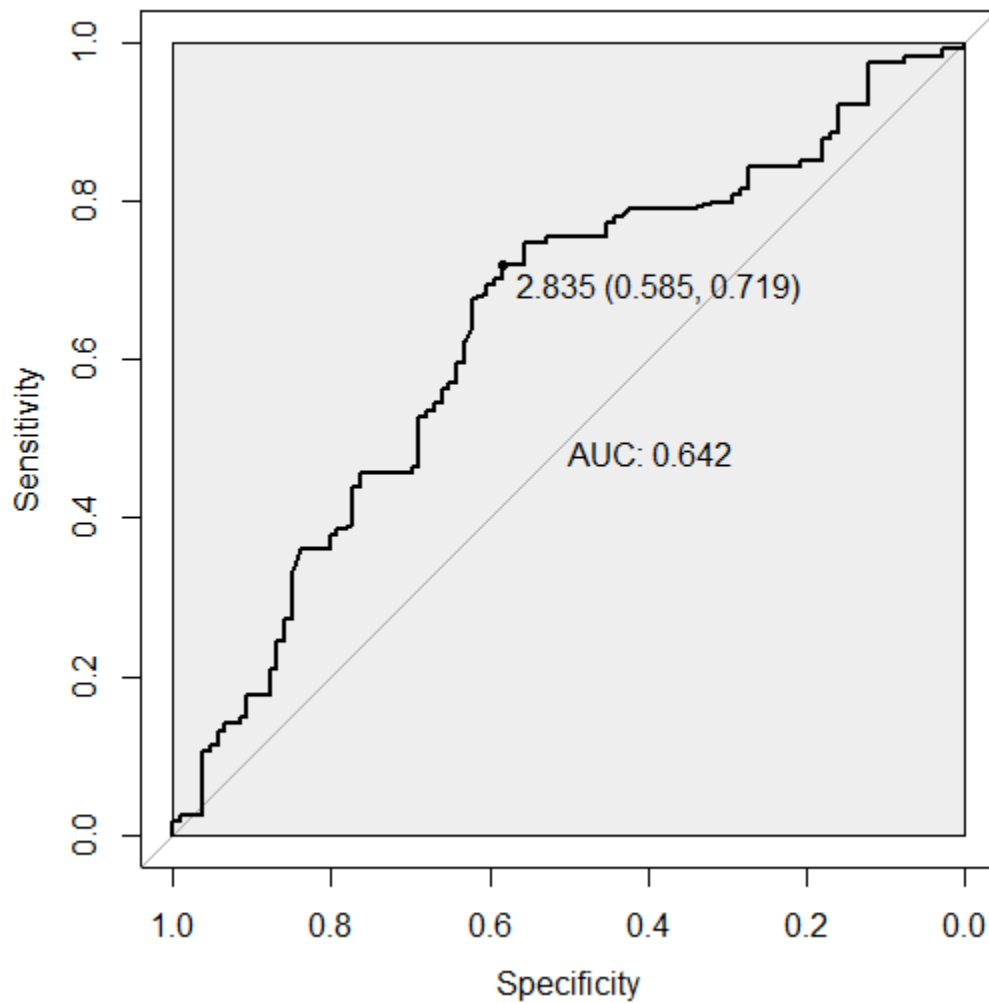

2

3 **Figure 1. Receiver operator characteristic (ROC) curve for the predictive ability of the genetic risk**  
4 **score (GRS) for recurrent pregnancy loss.** The best predictive point is shown with the ideal cut-off  
5 for the GRS and with estimates for specificity and sensitivity at that point. *Abbreviation: AUC, area*  
6 *under the curve.*

7

8

## 1 References

- 2 1. Zegers-Hochschild F, Adamson G, de Mouzon J, Ishihara O, Mansour R, Nygren K, et al.  
3 International Committee for Monitoring Assisted Reproductive Technology (ICMART) and the  
4 World Health Organization (WHO) revised glossary of ART terminology, 2009\*. *Fertil Steril*.  
5 2009;92(5):1520–4.
- 6 2. Branch DW, Gibson M, Silver RM. Recurrent miscarriage. *N Engl J Med*. 2010;363(18):1740–  
7 7.
- 8 3. Christiansen OB, Steffensen R, Nielsen HS, Varming K. Multifactorial etiology of recurrent  
9 miscarriage and its scientific and clinical implications. *Gynecol Obstet Invest*. 2008;66(4):257–  
10 67.
- 11 4. Ford HB, Schust DJ. Recurrent pregnancy loss: Etiology, Diagnosis, and Therapy. *Rev Obs*  
12 *Gynecol*. 2009;2(2):76–83.
- 13 5. Rull K, Nagirnaja L, Laan M. Genetics of recurrent miscarriage: Challenges, current  
14 knowledge, future directions. *Front Genet*. 2012;3:1–13.
- 15 6. Sugiura-Ogasawara M, Ozaki Y, Katano K, Suzumori N, Kitaori T, Mizutani E. Abnormal  
16 embryonic karyotype is the most frequent cause of recurrent miscarriage. *Hum Reprod*.  
17 2012;27(8):2297–303.
- 18 7. Werner M, Reh A, Grifo J, Perle MA. Characteristics of chromosomal abnormalities diagnosed  
19 after spontaneous abortions in an infertile population. *J Assist Reprod Genet*. 2012;29(8):817–  
20 20.
- 21 8. Li TC, Makris M, Tomsu M, Tuckerman E, Laird S. Recurrent miscarriage: Aetiology,  
22 management and prognosis. *Hum Reprod Update*. 2002;8(5):463–81.
- 23 9. Christiansen OB, Nybo Andersen A-M, Bosch E, Daya S, Delves PJ, Hviid T V, et al.  
24 Evidence-based investigations and treatments of recurrent pregnancy loss. *Fertil Steril*.  
25 2005;83(4):821–39.
- 26 10. Kolte AM, Nielsen HS, Moltke I, Degn B, Pedersen B, Sunde L, et al. A genome-wide scan in  
27 affected sibling pairs with idiopathic recurrent miscarriage suggests genetic linkage. *Mol Hum*  
28 *Reprod*. 2011;17(6):379–85.
- 29 11. GWAS results of the UK Biobank data [Internet]. [cited 2018 Nov 9]. Available from:  
30 <http://www.nealelab.is/uk-biobank>
- 31 12. Klarin D, Emdin CA, Natarajan P, Conrad MF, Kathiresan S, INVENT Consortium. Genetic  
32 Analysis of Venous Thromboembolism in UK Biobank Identifies the ZFPM2 Locus and  
33 Implicates Obesity as a Causal Risk Factor Derek. *Circ Cardiovasc Genet*.  
34 2017;10(2):e001643.
- 35 13. Germain M, Chasman DI, De Haan H, Tang W, Lindström S, Weng LC, et al. Meta-analysis of  
36 65,734 individuals identifies TSPAN15 and SLC44A2 as two susceptibility loci for venous  
37 thromboembolism. *Am J Hum Genet*. 2015;96(4):532–42.
- 38 14. Hinds DA, Buil A, Ziemek D, Martinez-Perez A, Malik R, Folkersen L, et al. Genome-wide  
39 association analysis of self-reported events in 6135 individuals and 252 827 controls identifies  
40 8 loci associated with thrombosis. *Hum Mol Genet*. 2016;25(9):1867–74.
- 41 15. John A. Heit, M.D., Sebastian M. Armasu, M.S., Yan W. Asmann, Ph.D., Julie M.  
42 Cunningham, Ph.D., Martha E. Matsumoto, B.S., Tanya M. Petterson, M.S., and Mariza de  
43 Andrade PD. A genome-wide association study of venous thromboembolism identifies risk  
44 variants in chromosomes 1q24.2 and 9q. *J Thromb Haemost*. 2013;10(8):1521–31.
- 45 16. Rai R, Regan L. Recurrent miscarriage. *Lancet*. 2006;368:601–11.
- 46 17. Kovalevsky G, Gracia CR, Berlin JA, Sammel MD, Barnhart KT. Evaluation of the association  
47 between hereditary thrombophilias and recurrent pregnancy loss: a meta-analysis. *Arch Intern*  
48 *Med*. 2004 Mar;164(5):558–63.
- 49 18. Barlik M, Seremak-Mrozikiewicz A, Drews K, Klejewski A, Kurzawińska G, Łowicki Z, et al.  
50 Correlation between factor VII and PAI-1 genetic variants and recurrent miscarriage. *Ginekol*  
51 *Pol*. 2016;87(7):504–9.
- 52 19. Giusti B, Gori AM, Marcucci R, Sestini I, Saracini C, Paniccchia R, et al. Role of glycoprotein Ia  
53 gene polymorphisms in determining platelet function in myocardial infarction patients  
54 undergoing percutaneous coronary intervention on dual antiplatelet treatment. *Atherosclerosis*.

- 1 2008;196(1):341–8.
- 2 20. Pepe GJ, Albrecht ED. Actions of placental and fetal adrenal steroid hormones in primate
- 3 pregnancy. *Endocr Rev.* 1995;16(1):608–48.
- 4 21. Ayvaz ÖÜ, Ekmekçi A, Baltacı V, Önen HI, Ünsal E. Evaluation of in vitro fertilization
- 5 parameters and estrogen receptor alpha gene polymorphisms for women with unexplained
- 6 infertility. *J Assist Reprod Genet.* 2009;26(9–10):503–10.
- 7 22. Herynk MH, Fuqua SAW. Estrogen receptor mutations in human disease. *Endocr Rev.*
- 8 2004;25(6):869–98.
- 9 23. Su M-T, Lin S-H, Chen Y-C. Genetic association studies of angiogenesis- and
- 10 vasoconstriction-related genes in women with recurrent pregnancy loss: a systematic review
- 11 and meta-analysis. *Hum Reprod Update.* Jan;17(6):803–12.
- 12 24. Sapkota Y, Steinhorsdottir V, Morris AP, Fassbender A, Rahmioglu N, De Vivo I, et al. Meta-
- 13 analysis identifies five novel loci associated with endometriosis highlighting key genes
- 14 involved in hormone metabolism. *Nat Commun.* 2017;8(15539).
- 15 25. Barban N, Jansen R, De Vlaming R, Vaez A, Mandemakers JJ, Tropf FC, et al. Genome-wide
- 16 analysis identifies 12 loci influencing human reproductive behavior. *Nat Genet.*
- 17 2016;48(12):1–7.
- 18 26. Chen Q, Zhang Y, Peng H, Lei L, Kuang H, Zhang L, et al. Transient  $\beta$ 2-adrenoceptor
- 19 activation confers pregnancy loss by disrupting embryo spacing at implantation. *J Biol Chem.*
- 20 2011;286(6):4349–56.
- 21 27. Suh YJ, Park HJ, Lee KA, Lee BE, Ha EH, Kim YJ. Associations Between Genetic
- 22 Polymorphisms of Beta-2 Adrenergic Receptor and Preterm Delivery in Korean Women. *Am J*
- 23 *Reprod Immunol.* 2013;69(1):85–91.
- 24 28. Peterlin A, Maver A, Jan Z, Lovrecic L, Tul N, Peterlin B. Polymorphism of the ADRB2
- 25 rs1042713 gene is not associated with spontaneous preterm birth: Analyses in a Slovenian
- 26 sample and meta analysis. *Balk J Med Genet.* 2017;20(2):35–42.
- 27 29. Park JY, Lee NR, Lee KE, Park S, Kim YJ, Gwak HS. Effects of  $\beta$ 2-adrenergic receptor gene
- 28 polymorphisms on ritodrine therapy in pregnant women with preterm labor: Prospective
- 29 follow-up study. *Int J Mol Sci.* 2014;15(7):12885–94.
- 30 30. Ayuk PT-Y, Theophanous D, D’Souza SW, Sibley CP, Glazier JD. L-Arginine Transport by
- 31 the Microvillous Plasma Membrane of the Syncytiotrophoblast from Human Placenta in
- 32 Relation to Nitric Oxide Production: Effects of Gestation, Preeclampsia, and Intrauterine
- 33 Growth Restriction. *J Clin Endocrinol Metab.* 2002;87(2):747–51.
- 34 31. Yang C, Fangfang W, Jie L, Yanlong Y, Jie W, Xuefei L, et al. Angiotensin-converting
- 35 enzyme insertion/deletion (I/D) polymorphisms and recurrent pregnancy loss: a meta-analysis.
- 36 *J Assist Reprod Genet.* 2012 Nov;29(11):1167–73.
- 37 32. Sayed-Tabatabaei FA, Oostra BA, Isaacs A, Van Duijn CM, Wittteman JCM. ACE
- 38 polymorphisms. *Circ Res.* 2006;98(9):1123–33.
- 39 33. Ueda S, Elliott HL, Morton JJ, Connell JM. Enhanced pressor response to angiotensin I in
- 40 normotensive men with the deletion genotype (DD) for angiotensin-converting enzyme.
- 41 *Hypertension.* 1995;25(6):1266–9.
- 42 34. Buchholz T, Thaler CJ. Inherited thrombophilia: Impact on human reproduction. *Am J Reprod*
- 43 *Immunol.* 2003;50(1):20–32.
- 44 35. Fatini C, Gensini F, Sticchi E, Battaglini B, Prisco D, Fedi S, et al. ACE DD genotype: An
- 45 independent predisposition factor to venous thromboembolism. *Eur J Clin Invest.*
- 46 2003;33(8):642–7.
- 47 36. Kimura H, Gejyo F, Suzuki Y, Suzuki S, Miyazaki R, Arakawa M. Polymorphisms of
- 48 angiotensin converting enzyme and plasminogen activator inhibitor-1 genes in diabetes and
- 49 macroangiopathy. *Kidney Int.* 1998;54(5):1659–69.
- 50 37. Martin D, Conrad KP. Expression of Endothelial Nitric Oxide Synthase by Extravillous
- 51 Trophoblast Cells in the Human Placenta. *Placenta.* 2000;21:23–31.
- 52 38. Pare G, Chasman DI, Parker AN, Zee RRY, Malarstig A, Seedorf U, et al. Novel Associations
- 53 of CPS1, MUT, NOX4 and DPEP1 with Plasma Homocysteine in a Healthy Population: A
- 54 Genome Wide Evaluation of 13,974 Participants in the Women’s Genome Health Study
- 55 Guillaumé. *Circ Cardiovasc Genet.* 2009;2(2):142–50.

- 1 39. Van Meurs JBJ, Pare G, Schwartz SM, Hazra A, Tanaka T, Vermeulen SH, et al. Common  
2 genetic loci influencing plasma homocysteine concentrations and their effect on risk of  
3 coronary artery disease. *Am J Clin Nutr.* 2013;98(3):668–76.
- 4 40. Deng C, Tang S, Huang X, Gao J, Tian J, Zhou X, et al. Identification of three novel loci of  
5 ALDH2 Gene for Serum Folate levels in a Male Chinese Population by Genome-Wide  
6 Association Study. *Gene.* 2018;674:121–6.
- 7 41. Obwegeser R, Hohlagschwandtner M, Sinzinger H. Homocysteine - A pathophysiological  
8 cornerstone in obstetrical and gynaecological disorders. *Hum Reprod Update.* 1999;5(1):64–  
9 72.
- 10 42. Steegers-Theunissen RP, Boers GH, Blom HJ, Trijbels FJ, Eskes TK. Hyperhomocysteinaemia  
11 and recurrent spontaneous abortion or abruptio placentae. *Lancet.* 1992;339(8801):1122–3.
- 12 43. Wouters MG, Boers GH, Blom HJ, Trijbels FJ, Thomas CM, Borm GF, et al.  
13 Hyperhomocysteinemia: a risk factor in women with unexplained recurrent early pregnancy  
14 loss. *Fertil Steril.* 1993;60(5):820–5.
- 15 44. Quere I, Wutschert R, Zittoun J, Bellet H, Reber G, Gris JC, et al. Association of red-blood  
16 methylfolate but not plasma folate with C677T MTHFR polymorphism in venous  
17 thromboembolic disease. *Thromb Haemost.* 1998;80(4):707–9.
- 18 45. Coumans ABC, Huijgens PC, Jakobs C, Schats R, Vries JIP De, Pampus MG Van, et al.  
19 Haemostatic and metabolic abnormalities in women with unexplained recurrent abortion. *Hum*  
20 *Reprod.* 1999;14(1):211–4.
- 21 46. Nelen WLDM, Steegers EAP, Eskes TKAB, Blom HJ, Wang H, Zhang M, et al. Genetic risk  
22 factor for unexplained recurrent early pregnancy loss Fetuin protects the fetus from TNF  
23 Differences between RhD-negative Africans and RhD-negative Europeans. *Lancet.*  
24 1997;350:861–2.
- 25 47. Cao Y, Xu J, Zhang Z, Huang X, Zhang A, Wang J, et al. Association study between  
26 methylenetetrahydrofolate reductase polymorphisms and unexplained recurrent pregnancy loss:  
27 a meta-analysis. *Gene.* 2013;514(2):105–11.
- 28 48. Kucherenko A, Gulkovskyi R, Khazhylenko K, Vorobiova I, Nakvasiuk T, Livshits L.  
29 Recurrent pregnancy loss association with allelic variants of IL8 and IL10 genes. *ScienceRise.*  
30 2014;2(2):7–10.
- 31 49. Cochery-Nouvellon E, Nguyen P, Attaoua R, Cornillet-Lefebvre P, Mercier E, Vitry F, et al.  
32 Interleukin 10 gene promoter polymorphisms in women with pregnancy loss: preferential  
33 association with embryonic wastage. *Biol Reprod.* 2009;80(6):1115–20.
- 34 50. Daher S, Shulzhenko N, Morgun A, Mattar R, Rampim GF, Camano L, et al. Associations  
35 between cytokine gene polymorphisms and recurrent pregnancy loss. *J Reprod Immunol.*  
36 2003;58(1):69–77.
- 37 51. Lee YH, Choi SJ, Ji JD. Association between IL-6 -174 G/C, IL-6 -634 G/C, and IFN- $\gamma$  +874  
38 A/T polymorphisms and susceptibility to recurrent pregnancy loss: a meta-analysis. *J Assist*  
39 *Reprod Genet.* 2015;32(9):1421–7.
- 40 52. Weimar CHE, Macklon NS, Uiterweer EDP, Brosens JJ, Gellersen B. The motile and invasive  
41 capacity of human endometrial stromal cells : implications for normal and impaired  
42 reproductive function. 2013;19(5):542–57.
- 43 53. The Practice Committee of the American Society for Reproductive Medicine. Evaluation and  
44 treatment of recurrent pregnancy loss: A committee opinion. *Fertil Steril.* 2012;98(5):1103–11.
- 45 54. Belsky DW, Moffitt TE, Sugden K, Williams B, Houts R, McCarthy J, et al. Development and  
46 evaluation of a genetic risk score for obesity. *Biodemography Soc Biol.* 2013;59(1):85–100.
- 47 55. R Core Team. R: A language and environment for statistical computing. [Internet]. R  
48 Foundation for Statistical Computing, Vienna, Austria.; 2014. Available from: [http://www.r-](http://www.r-project.org/)  
49 [project.org/](http://www.r-project.org/)
- 50 56. Su M-T, Lin S-H, Chen Y-C. Association of sex hormone receptor gene polymorphisms with  
51 recurrent pregnancy loss: a systematic review and meta-analysis. *Fertil Steril.*  
52 2011;96(6):1435–1444.e1.
- 53 57. Prokopenko I, McCarthy MI, Lindgren CM. Type 2 diabetes: new genes, new understanding.  
54 *Trends Genet.* 2008;24(12):613–21.
- 55 58. Khera A V, Chaffin M, Aragam KG, Haas ME, Roselli C, Choi SH, et al. Genome-wide

- 1 polygenic scores for common diseases identify individuals with risk equivalent to monogenic  
2 mutations. *Nat Genet.* 2018;50(9):1219–24.
- 3 59. Bombell S, McGuire W. Cytokine polymorphisms in women with recurrent pregnancy loss:  
4 Meta-analysis. *Aust New Zeal J Obstet Gynaecol.* 2008;48(2):147–54.
- 5 60. Koksai V, Baris I, Etlík O. Primer-engineered multiplex PCR-RFLP for detection of MTHFR  
6 C677T, prothrombin G20210A and factor V Leiden mutations. *Exp Mol Pathol.* 2007;83(1):1–  
7 3.
- 8 61. Saha N, Liu Y, Heng CK, Hong S, Low PS, Tay JS. Association of factor VII genotype with  
9 plasma factor VII activity and antigen levels in healthy Indian adults and interaction with  
10 triglycerides. *Arterioscler Thromb a J Vasc Biol.* 1994;14(12):1923–7.
- 11 62. Kroll H, Fechter A, Gardemann A. The role of the glycoprotein IIb fibrinogen receptor subunit  
12 T2622G gene polymorphism (HPA-3) on coronary artery disease and acute myocardial  
13 infarction. *Thromb Haemost.* 2001;85(1):182–3.
- 14 63. Livshyts GB, Kucherenko AM, Podlesna SS, Kravchenko SA, Livshits LA. Analysis of allelic  
15 polymorphism in the ESR1 gene in the Ukraine's population. *Cytol Genet.* 2012;46(4):220–6.
- 16 64. Littlejohn MD, Taylor DR, Miller AL, Kennedy MA. Determination of beta2-adrenergic  
17 receptor (ADRB2) haplotypes by a multiplexed polymerase chain reaction assay. *Hum Mutat.*  
18 2002;20(6):479.
- 19 65. Safarinejad MR, Khoshdel A, Shekarchi B, Taghva A, Safarinejad S. Association of the T-  
20 786C, G894T and 4a/4b polymorphisms of the endothelial nitric oxide synthase gene with  
21 vasculogenic erectile dysfunction in Iranian subjects. *BJU Int.* 2011;107(12):1994–2001.
- 22 66. Lindpaintner K, Pfeffer MA, Al. E. A prospective evaluation of an angiotensin-converting-  
23 enzyme gene polymorphism and the risk of ischemic heart disease. *N Engl J Med.*  
24 1995;332:706–11.
- 25 67. Shazia M, Raheel Q, Farah A, Wajid AK, Asifa A. C677T polymorphism in the  
26 methylenetetrahydrofolate reductase gene is associated with primary closed angle glaucoma.  
27 *Mol Vis.* 2008;14:661–5.
- 28 68. Fishman D, Faulds G, Jeffrey R, Mohamed-Ali V, Yudkin JS, Humphries S, et al. The effect of  
29 novel polymorphisms in the interleukin-6 (IL-6) gene on IL-6 transcription and plasma IL-6  
30 levels, and an association with systemic-onset juvenile chronic arthritis. *J Clin Invest.*  
31 1998;102(7):1369–76.
- 32 69. Heinzmann A, Ahlert I, Kurz T, Berner R, Deichmann KA. Association study suggests  
33 opposite effects of polymorphisms within IL8 on bronchial asthma and respiratory syncytial  
34 virus bronchiolitis. *J Allergy Clin Immunol.* 2004;114(3):671–6.
- 35 70. Costa GC, Rocha MO da C, Moreira PR, Menezes CAS, Silva MR, Gollob KJ, et al.  
36 Functional IL-10 Gene Polymorphism Is Associated with Chagas Disease Cardiomyopathy. *J*  
37 *Infect Dis.* 2009;199(3):451–4.
- 38 71. Temple S EL, Lim E, Cheong K, Almeida C-AM, Proce P, Ardlie KG, et al. Alleles carried at  
39 positions -819 and -592 of the IL10 promoter affect transcription following stimulation of  
40 peripheral blood cells with *Streptococcus pneumoniae*. *Immunogenetics.* 2003;55:629–32.  
41
